# Supplementary material for: Localization of TFIIB binding regions using serial analysis of chromatin occupancy
Source: PubMed Central journal article supplement (PMC2211499; doi:10.1186/1471-2199-8-102), 2007-11-12
Supplement: 1471-2199-8-102-S1.pdf [file 1471-2199-8-102-S1.pdf]

| Chromosome (size in Mb) | Mapped TIIB GSTs | GST/ Mb |
|-------------------------|------------------|---------|
| chr:1 (267.4 Mb)        | 1416             | 5.3     |
| chr:2 (255.3 Mb)        | 1133             | 4.4     |
| chr:3 (166.0 Mb)        | 864              | 5.2     |
| chr:4 (186.1 Mb)        | 809              | 4.3     |
| chr:5 (171.6 Mb)        | 764              | 4.5     |
| chr:6 (134.2 Mb)        | 810              | 6.0     |
| chr:7 (141.6 Mb)        | 1040             | 7.3     |
| chr:8 (126.8 Mb)        | 576              | 4.5     |
| chr:9 (109.5 Mb)        | 396              | 3.6     |
| chr:10 (101.2 Mb)       | 788              | 7.8     |
| chr:11 (73.6 Mb)        | 389              | 5.3     |
| chr:12 (43.6 Mb)        | 324              | 7.4     |
| chr:13 (75.1 Mb)        | 469              | 6.2     |
| chr:14 (105.7 Mb)       | 510              | 4.8     |
| chr:15 (106.1 Mb)       | 304              | 2.9     |
| chr:16 (76.6 Mb)        | 599              | 7.8     |
| chr:17 (91.0 Mb)        | 432              | 4.8     |
| chr:18 (84.7 Mb)        | 392              | 4.6     |
| chr:19 (56.4 Mb)        | 210              | 3.7     |
| chr:20 (50.6 Mb)        | 321              | 6.4     |
| chr:X (130.8 Mb)        | 270              | 2.1     |
