# Supplementary material for: Localization of TFIIB binding regions using serial analysis of chromatin occupancy
Source: PubMed Central journal article supplement (PMC2211499; doi:10.1186/1471-2199-8-102), 2007-11-12
Supplement: 1471-2199-8-102-S3.pdf [file 1471-2199-8-102-S3.pdf]

L

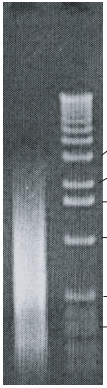

3054

2036

1636

1018

506

298
